# The stem rust fungus *Puccinia graminis* f. sp. *tritici* induces waves of small RNAs with opposing profiles during wheat infection

Jana Sperschneider<sup>1,2#</sup>, Silke Jacques<sup>3</sup>, Bo Xu<sup>4</sup>, Narayana M. Upadhyaya<sup>2</sup>, Rohit Mago<sup>2</sup>, Ashley W. Jones<sup>5</sup>, Benjamin Schwessinger<sup>5</sup>, Melania Figueroa<sup>2</sup>, Karam B. Singh<sup>3,6</sup>, Eric A. Stone<sup>1</sup>, Ming-Bo Wang<sup>2</sup>, Jennifer M. Taylor<sup>2</sup>, Peter N. Dodds<sup>2#</sup>

<sup>1</sup>Biological Data Science Institute, The Australian National University, Canberra, Australia

<sup>2</sup>Black Mountain Science and Innovation Park, CSIRO Agriculture and Food, Canberra, Australia

<sup>3</sup>Centre for Crop and Disease Management, Department of Environment and Agriculture, Curtin University, Bentley, Australia

<sup>4</sup>Thermo Fisher Scientific, 5 Caribbean Drive, Scoresby, Australia

<sup>5</sup>Research School of Biology, The Australian National University, Acton ACT 2601, Australia

<sup>6</sup>Centre for Environment and Life Sciences, CSIRO Agriculture and Food, Perth, Australia

**Running head:** Small RNAs in the stem rust fungus

# Address correspondence to Jana Sperschneider, [jana.sperschneider@anu.edu.au](mailto:jana.sperschneider@anu.edu.au) and Peter N. Dodds, [peter.dodds@csiro.au](mailto:peter.dodds@csiro.au)

## Abstract

The fungus *Puccinia graminis* f. sp. *tritici* (*Pgt*) causes devastating stem rust disease on wheat. Infection occurs when rust spores germinate on the leaf surface and subsequently, specialized infection structures called haustoria form inside host cells followed by sporulation. Small RNA and transcriptome sequencing during *Pgt*-wheat infection reveals that the *Pgt* RNA interference (RNAi) machinery has functionally diversified. A number of *Pgt* RNAi genes are strongly up-regulated during late infection compared to the start of infection. This coincides with the production of two distinct *Pgt* small RNA (sRNA) profiles. At the start of infection, *Pgt* induces predominantly 21 nt sRNAs with a 5' uracil derived from genes. In contrast, during late infection *Pgt* induces 22 nt sRNAs with a 5' adenine derived from repeats. Strikingly, over 85% of *Pgt* sRNAs are differentially expressed during infection, compared to only 4% of wheat sRNAs. Using chromatin conformation capture assay data (Hi-C), we define *Pgt* centromeres and show that sRNAs up-regulated during late infection are derived from those repeat-rich, gene-poor and transcriptionally silent centromeric regions. We conclude that the *Pgt* RNAi machinery is highly regulated, resulting in differential accumulation of sRNA types throughout the infection cycle. Such tight temporal control of the RNAi machinery has thus far not been observed in fungi and might ensure genome stability during sporulation in rust fungi.

## Importance

The wheat stem rust disease caused by *Puccinia graminis* f. sp. *tritici* (*Pgt*) is one of the most devastating crop diseases and of significant global interest. Despite the availability of genomic resources, we have limited insight into how *Pgt* is able to quickly and aggressively overcome plant resistance. In this work, we deliver the first-time characterization of how *Pgt* utilizes small RNAs (sRNAs) during infection. Our work uncovers fundamental characteristics of the stem rust RNAi machinery and the first characterization of rust centromeres. Future research can use this knowledge to optimize methods of host-induced gene silencing where small RNAs from the plant operate via the fungus's own RNAi machinery to silence genes important for causing disease.

**Keywords:** small RNA, miRNA, stem rust, *Puccinia graminis* f. sp. *tritici*, fungal pathogen, centromeres

## Introduction

46 The basidiomycete fungus *Puccinia graminis* f. sp. *tritici* (*Pgt*) is a plant pathogen that causes wheat stem rust  
47 disease, resulting in devastating crop losses (Dubin, 2009). *Pgt* is a dikaryotic fungus that contains two distinct  
48 haploid nuclei. During the asexual infection phase on a cereal host, *Pgt* produces single-celled dikaryotic  
49 urediniospores that germinate on the leaf surface (Leonard & Szabo, 2005; Figueroa *et al.*, 2016).  
50 Subsequently, appressoria form and penetration through stomata occurs with development of specialized  
51 infection structures called haustoria by around 2 days. Haustoria enable nutrient uptake as well as the delivery  
52 of secreted pathogen proteins called effectors into the host plant cell (Garnica *et al.*, 2014). The start of  
53 urediniospore production occurs at approximately 6-7 days post infection (dpi) and urediniospore pustules  
54 typically erupt through the leaf or stem surface (sporulation) after 8–10 dpi (Figueroa *et al.*, 2016). In the  
55 poplar rusts, intense cell division activity has been observed in the sporulation area (Hacquard *et al.*, 2011).

56 Whilst substantial time-course transcriptomic resources have been generated for *Pgt* (Duplessis *et al.*, 2011;  
57 Upadhyaya *et al.*, 2015; Chen *et al.*, 2017), how it utilizes its RNA interference (RNAi) machinery during the  
58 infection cycle has thus far been unknown. Small RNAs (sRNAs) are 20-30 nucleotide (nt) short regulatory  
59 non-coding RNAs that function in transcriptional or posttranscriptional gene silencing through sequence  
60 complementarity (Grosshans & Filipowicz, 2008). In plants, sRNAs are predominantly in the size range of  
61 20-24 nt and can be divided into two classes: small interfering RNAs (siRNAs) processed by Dicer proteins  
62 from long double-stranded RNA (dsRNA) and microRNAs (miRNAs) processed from stem-loop regions of  
63 single-stranded primary RNAs (Borges & Martienssen, 2015). Endogenous dsRNA is generated by RNA-  
64 dependent RNA polymerases (RdRPs) from single-stranded RNA (ssRNA), whereas self-folding miRNA  
65 precursors are transcribed by RNA Polymerase II from MIRNA genes (Axtell *et al.*, 2011). Both miRNAs and  
66 siRNAs are bound to argonaute (AGO) proteins to induce silencing of targets by base-pairing interactions and  
67 complementarity (Czech & Hannon, 2011). Post-transcriptional gene silencing (PTGS) is induced by sRNAs  
68 in the cytoplasm, which target complementary mRNAs for degradation or translational repression. In plants,  
69 successful identification of a target by miRNA/AGO complexes and some siRNA/AGO complexes induces  
70 PTGS and can trigger secondary siRNA production (Chen *et al.*, 2010). AGO1, the dominant player in PTGS,  
71 preferentially interacts with sRNA with a 5' uracil to induce silencing. In contrast, transcriptional gene  
72 silencing (TGS) is induced by nucleus-localized sRNAs through epigenetic modifications, such as DNA  
73 cytosine methylation and histone methylation, to homologous regions of the genome (Matzke & Mosher,  
74 2014). In plants, these nucleus-localized heterochromatic siRNAs (hc-siRNAs) are the most abundant sRNAs.  
75 They are predominantly 24 nts in length, derived from intergenic or repetitive regions and are associated with  
76 the AGO4 clade to regulate epigenetic silencing through RNA-directed DNA methylation (RdDM). Adenine  
77 is the most common 5' base of AGO4-bound 24 nt siRNAs in *Arabidopsis* (Lister *et al.*, 2008). In plants,  
78 RdDM is implicated in maintaining genome stability through transposon control, pathogen defence and stress  
79 responses, intercellular communication and germ cell specification (Matzke & Mosher, 2014).

80 In the diverse fungal kingdom, the RNAi machinery of the fission yeast *Schizosaccharomyces pombe* and the  
81 ascomycete fungus *Neurospora crassa* are thus far the best-studied (Chang *et al.*, 2012). Quelling is an RNAi-  
82 related gene-silencing mechanism in *Neurospora* that is induced by repetitive transgenic sequences and occurs  
83 in the vegetative growth stage to control transposons (Romano & Macino, 1992). In *Schizosaccharomyces*  
84 *pombe*, RNAi components are required for heterochromatin formation (Volpe *et al.*, 2002). The roles of  
85 sRNAs in eukaryotic plant pathogens have thus far not been extensively characterized (Weiberg *et al.*, 2014).  
86 In *Phytophthora* spp., sRNAs are putatively involved in effector gene and transposable element (TE)  
87 regulation and are predominantly of the size classes of 21 nt, 25-26 nt and 32 nt (Vetukuri *et al.*, 2012). Many  
88 *Phytophthora* sRNAs of all size classes map to TEs, particularly to long terminal repeat (LTR)  
89 retrotransposons. Another class of sRNAs map to Crinkler effector genes and were predominantly of the 21  
90 nt size class. In *Magnaporthe oryzae*, 18-23 nt sRNAs are produced from repetitive elements and are  
91 implicated in TE regulation in vegetative tissue, whereas 28-35 nt sRNAs mapping to transfer RNA (tRNA)  
92 loci are enriched in the appressoria (Nunes *et al.*, 2011). Several cross-kingdom RNAi interactions between  
93 fungal pathogens and plants have been uncovered. Some *Botrytis cinerea* sRNAs silence *Arabidopsis* and  
94 tomato genes involved in plant immunity and are mainly derived from LTR retrotransposons and are 21 nt in  
95 size with a 5' uracil (Weiberg *et al.*, 2013), while *Arabidopsis* cells secrete exosome-like extracellular vesicles  
96 to deliver sRNAs into the fungal pathogen *Botrytis cinerea* to silence pathogenicity genes (Cai *et al.*, 2018).  
97 The wheat stripe rust fungus *Puccinia striiformis* f. sp. *tritici* (*Pst*) produces a large number of 20-22 nt sRNAs

98 and expresses RNAi genes during infection (Mueth *et al.*, 2015). One 20 nt sRNA appears to target the wheat  
99 defence pathogenesis-related 2 (*PR2*) gene (Wang *et al.*, 2017). The fungal pathogen *Sclerotinia sclerotiorum*  
100 produces mainly 22-23 nt sRNAs with a 5' uracil from repeat-rich regions during infection (Derbyshire *et al.*,  
101 2019). The production of sRNAs and their potential roles in *Pgt* development and pathogenicity has thus far  
102 not been investigated.

103 Recently, the chromosome-scale assembly of *Pgt* 21-0 has been made available (Li *et al.*, 2019). This assembly  
104 is fully phased with 18 chromosome pseudomolecules for each of the two haplotypes contained in the two  
105 nuclei. Chromosome-scale, long-read assemblies offer the opportunity to investigate the genomic localization  
106 of sRNAs and how this potentially links to their function. For example, highly repetitive loci such as  
107 centromeres generate sRNAs which in turn are required for silencing (van Wolfswinkel & Ketting, 2010).  
108 Centromeres are essential for chromosome segregation during cell division. Transcriptionally inactive  
109 chromatin (heterochromatin) is vital to maintain the integrity of the centromeres and is typically gene-poor,  
110 highly condensed and repetitive. Eukaryotic centromere sequences are highly diverse in sequence and can  
111 differ even between closely related species (Henikoff *et al.*, 2001). In fungi, their lengths range from point  
112 centromeres (<400 bp), short regional centromeres (>400 bp, <20 kb) to large regional centromeres (>20 kb)  
113 (Yadav *et al.*, 2018a). For example, the fission yeast *S. pombe* centromeres span between 35-110 kb and  
114 resemble those of vertebrates (central core domain of non-repetitive AT-rich DNA flanked by outer repeats),  
115 where the kinetochore is embedded in the heterochromatin of the outer repeats. In *Neurospora crassa*,  
116 centromeres are repetitive, AT-rich 150 to 300 kb long regions (Smith *et al.*, 2011). The human fungal  
117 pathogen *Cryptococcus* harbours large regional centromeres that are ORF-free regions rich in LTR  
118 retrotransposons (Yadav *et al.*, 2018b). RNAi has been suggested as a key determinant of longer centromeres  
119 in *Cryptococcus* and as a suppressor of centromeric retrotransposons to ensure genome stability (Yadav *et al.*,  
120 2018b). The formation of silent heterochromatin in some yeasts depends on siRNAs derived from  
121 pericentromeric regions and on the RNAi machinery (Reinhart & Bartel, 2002; Volpe *et al.*, 2002). Genes  
122 placed near centromeric chromatin are typically silenced (Fishel *et al.*, 1988; Pidoux & Allshire, 2005), with  
123 the strongest repression at the outer repeats (Allshire *et al.*, 1994; Allshire *et al.*, 1995). Centromeres are not  
124 well-studied in plant-pathogenic fungi and have thus far not been described in the genomes of rust fungi. In  
125 the rice blast fungus *Magnaporthe oryzae*, centromeres span 57-kb to 109-kb transcriptionally poor regions  
126 and share highly AT-rich and heavily methylated DNA sequences (Yadav *et al.*, 2019). Here we analyse sRNA  
127 expression in *Pgt* at different stages during infection and find evidence for two waves of sRNAs; an early  
128 expressed wave predominantly 21 nt with 5' uracil derived from genic sequences, and a late expressed wave  
129 of predominantly 22 nt with a 5' adenine derived from centromeric repeats.

## 131 Results

### 132 The expression profiles of the *Pgt* RNAi genes suggest their functional diversification

133 RNAi machinery genes were previously identified in the reference genome *Pgt* p7a (Duplessis *et al.*, 2011;  
134 Choi *et al.*, 2014). We searched for the *Pgt* p7a RNAi genes in the gene annotation of the fully phased,  
135 chromosome-scale assembly of *Pgt* 21-0. Two argonaute genes, three dicer genes and five RdRP genes are  
136 present in the annotation of *Pgt* 21-0 on each haplotype (Table 1). We assessed the expression of these RNAi  
137 genes during a time course of *Pgt* 21-0 infecting wheat from 2-7 days post infection (dpi) (Chen *et al.*, 2017)  
138 and in germinated spores and haustorial tissue (Upadhyaya *et al.*, 2015). Clustering of the RNAi gene  
139 expression profiles showed two main groups: one set of RNAi genes (argonaute B, RdRPs B/D/E and dicers  
140 A/B) that are constitutively expressed during infection and another set of RNAi genes (argonaute A, dicer C  
141 and RdRPs A/C) that are highly expressed only during the later stages of infection (Figure 1), with no or very  
142 low expression in germinated spores and during 2-4 dpi. We did not observe differences in expression patterns  
143 of the RNAi genes between the two *Pgt* haplotypes. Taken together, the gene expression analysis suggests  
144 that the *Pgt* RNAi machinery has functionally diversified and that *Pgt* uses RNAi to regulate stage-specific  
145 infection processes, such as the formation of new urediniospores during late infection.

147 **Table 1: RNAi genes in *Pgt*.** For each protein, the identifiers of the allelic proteins on each haplotype are given, with  
 148 their protein sequence identity. Homologs of the *Pgt* p7a PGTG\_13081 and PGTG\_13088 dicer proteins were not  
 149 found in the gene annotation of *Pgt* 21-0.

| RNAi genes        | Identifier  | <i>Pgt</i> 21-0 proteins                        | % identity between alleles | <i>Pgt</i> p7a identifier |
|-------------------|-------------|-------------------------------------------------|----------------------------|---------------------------|
| <b>Argonautes</b> | Argonaute A | PGT21_021399 (chr14A) and PGT21_022388 (chr14B) | 99.4%                      | PGTG_08429                |
|                   | Argonaute B | PGT21_001976 (chr13A) and PGT21_002123 (chr13B) | 99.8%                      | PGTG_11327                |
| <b>Dicer</b>      | Dicer A     | PGT21_033256 (chr4A) and PGT21_033881 (chr4B)   | 98%                        | PGTG_19535                |
|                   | Dicer B     | PGT21_033021 (chr4A) and PGT21_033709 (chr4B)   | 98.2%                      | PGTG_19538                |
|                   | Dicer C     | PGT21_029367 (chr6A) and PGT21_028061 (chr6B)   | 97.8%                      | PGTG_12289                |
|                   | Dicer D     | -                                               |                            | PGTG_13081                |
|                   | Dicer E     | -                                               |                            | PGTG_13088                |
| <b>RdRPs</b>      | RdRP A      | PGT21_002642 (chr10A) and PGT21_001684 (chr10B) | 99.6%                      | PGTG_20838                |
|                   | RdRP B      | PGT21_009430 (chr15A) and PGT21_009102 (chr15B) | 96.7%                      | PGTG_17766                |
|                   | RdRP C      | PGT21_009651 (chr14A) and PGT21_011158 (chr14B) | 99.2%                      | PGTG_02834                |
|                   | RdRP D      | PGT21_031631 (chr4A) and PGT21_032301 (chr4B)   | 99.7%                      | PGTG_05092                |
|                   | RdRP E      | PGT21_031875 (chr8A) and PGT21_035256 (chr16B)  | 99.4%                      | PGTG_09533                |

150

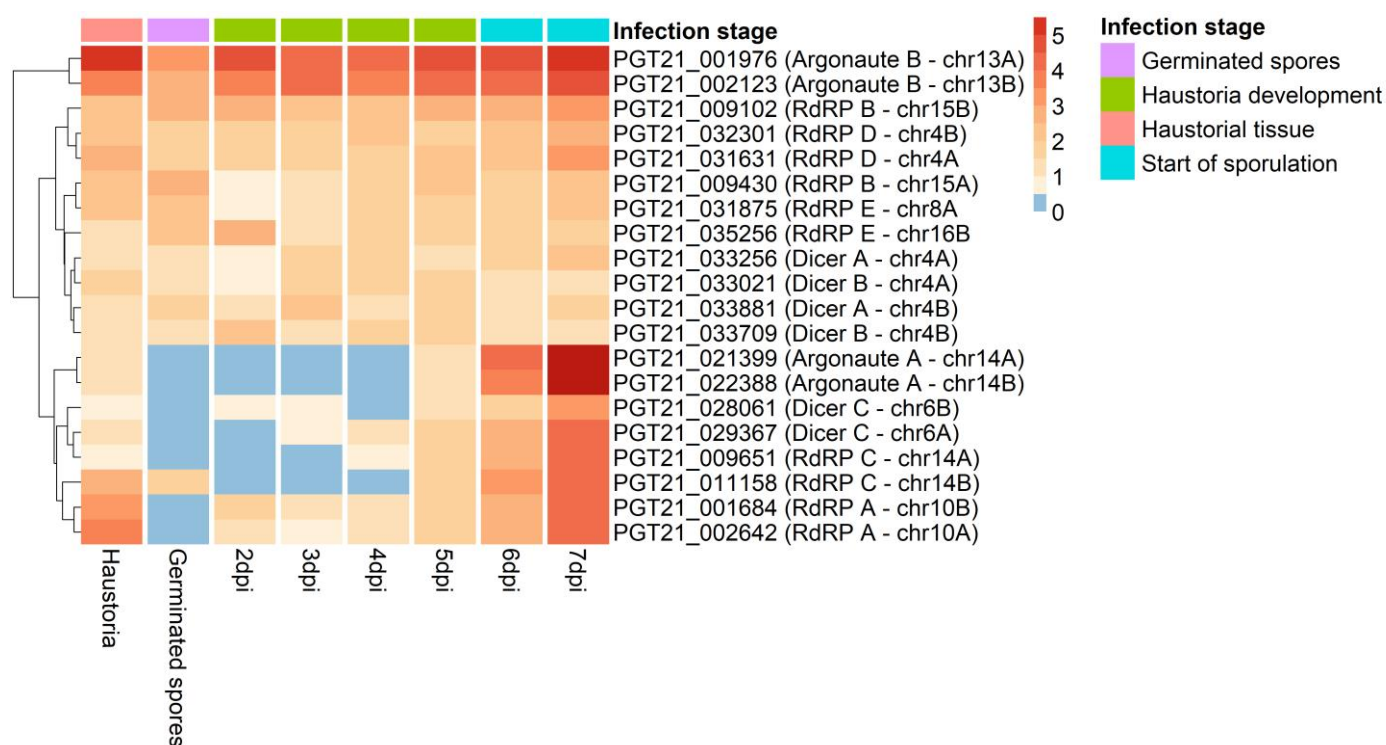

151

152 **Figure 1: *Pgt* 21-0 RNAi gene expression.** Hierarchical clustering of expression levels of *Pgt* RNAi genes in transcripts  
 153 per million ( $\log_{TPM}$ , red color intensity relates to high expression strength). The *Pgt* RNAi genes form two main clusters  
 154 of expression. The first consists of argonaute B, RdRPs B/D/E and dicers A/B that are expressed across all conditions.  
 155 The second cluster consists of RdRPs A/C, argonaute A and dicer C and these are highly expressed at the later stages of  
 156 infection (6-7 dpi).

157 ***Pgt* produces two distinct sRNA profiles during infection, similarly to wheat sRNAs**

158 To assess the role of the RNAi machinery during the rust infection cycle, we performed small RNA-  
 159 sequencing on germinated spores, uninfected wheat and infected wheat at 3 dpi, 5 dpi and 7 dpi. Adapter-  
 160 trimmed and tRNA/rRNA-filtered sRNA reads were first mapped to the wheat genome (IWGSC RefSeq v1.0)  
 161 and the *Pgt* 21-0 genome, allowing no mismatches. Strikingly, the read alignment rates show a strong presence  
 162 of *Pgt* sRNAs in the late infection sample (7 dpi, Table 2). The mapping rates to rust at 3 dpi and 5 dpi are  
 163 low at 0.57% and 1.76%, respectively, but increase drastically to 33.9% at 7 dpi. In contrast, 70.3% of sRNA  
 164 reads map to the wheat genome in the uninfected wheat samples. During infection, ~67% of sRNA reads map

165 to the wheat genome at 3 dpi and 5 dpi. Strikingly, at 7 dpi the sRNA mapping rate to wheat decreases to  
 166 30.3%.

167 **Table 2:** Small RNA read mapping rates to the wheat and rust genomes.

| Sample              | Number of reads | Mapped to <i>Pgt</i> | Mapped to wheat   |
|---------------------|-----------------|----------------------|-------------------|
| Germinated spores   | 27,536,477      | 10,363,582 (37.6%)   | 201,260 (0.73%)   |
| Uninfected wheat    | 2,353,359       | 7,298 (0.31%)        | 1,655,299 (70.3%) |
| Infected wheat 3dpi | 3,040,002       | 17,224 (0.57%)       | 2,053,891 (67.6%) |
| Infected wheat 5dpi | 2,914,397       | 51,222 (1.76%)       | 1,952,173 (67%)   |
| Infected wheat 7dpi | 5,815,521       | 1,971,350 (33.9%)    | 1,762,025 (30.3%) |

168

169 To annotate high-confidence *Pgt* and wheat sRNAs from the sequencing data, we used the ShortStack software  
 170 (Axtell, 2013). ShortStack predicts and quantifies sRNA-producing loci in a genome based on clusters of  
 171 sRNA reads and miRNA-producing loci according to a series of tests, such as strandedness of the locus and  
 172 the predicted precursor secondary structure. ShortStack predicted 4,599 *Pgt* sRNA loci (4,593 siRNAs and 6  
 173 miRNAs) and 394 wheat sRNA loci (343 siRNAs and 51 miRNAs) (Supplementary Files S1-S4). For each  
 174 predicted sRNA locus, ShortStack returns the single most abundant RNA. For predicted miRNA loci, this will  
 175 generally be the functional mature miRNA. The read length distributions of rust and wheat sRNA-producing  
 176 loci show different patterns and deviate from a random distribution (Figure 2). The *Pgt*-derived small RNAs  
 177 are predominantly 20, 21 or 22 nts in length, both for the single most abundant RNA in each locus as well as  
 178 the total reads forming the loci. However, there are two distinct peaks at 21 nt and 24 nt for the wheat sRNAs,  
 179 as is expected for plant sRNAs.

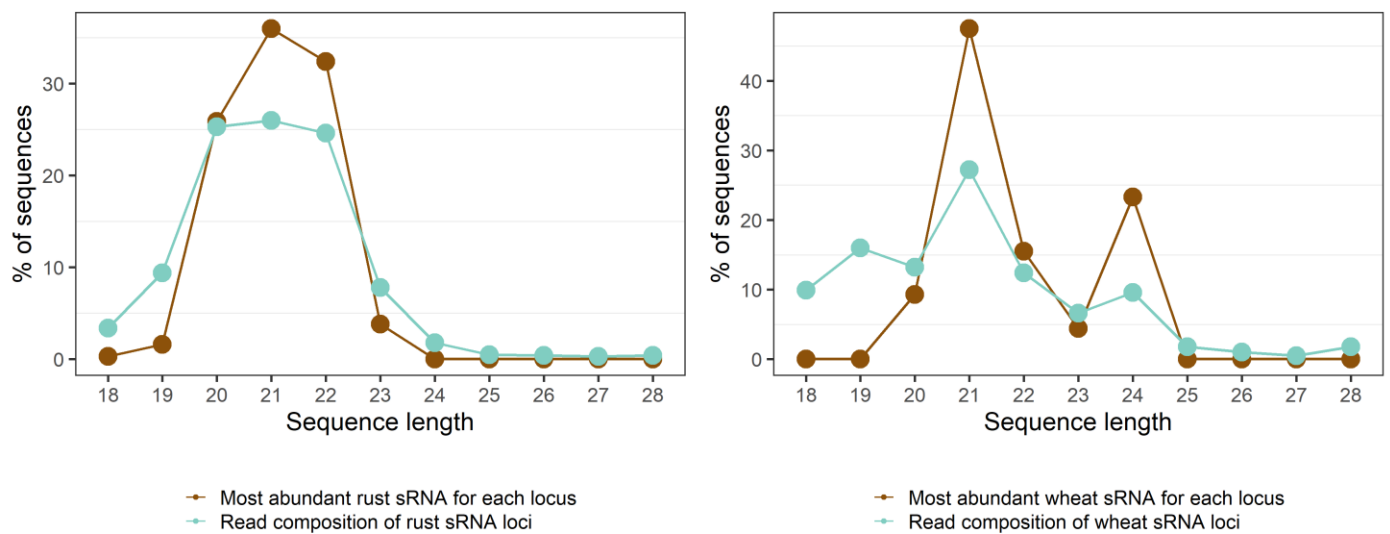

180

181

(A)

(B)

182 **Figure 2:** Sequence length distributions of predicted sRNAs in (A) rust and (B) wheat. The rust sRNAs are  
 183 predominantly 20-22 nt in length, whereas the plant sRNAs show strong peaks at 21 nt and 24 nt.

184 We then assessed the 5' nucleotide preferences for the single most abundant RNAs in each cluster. As  
 185 expected, most wheat miRNAs are 21 nt and have a 5' uracil (76.4%) while the wheat siRNAs are mostly  
 186 either 21 nt with a 5' uracil or 24 nt with a 5' adenine. The two distinct peaks at 21 and 24 nts with their  
 187 corresponding 5' nucleotide preferences support the predicted presence of both miRNAs and siRNAs in the  
 188 wheat sRNA set. The 24 nt wheat siRNAs likely represent siRNAs involved in RNA-directed DNA  
 189 methylation (Lister *et al.*, 2008; Geng *et al.*, 2019). Two distinct classes of siRNAs also appear to be present  
 190 in *Pgt* based on 5' nucleotide preference, although differing in size to the wheat siRNAs. *Pgt* siRNAs of  
 191 length 20-21 nts have a strong preference for a 5' uracil (~76%), whereas 53% of 22 nt *Pgt* siRNAs have a 5'

adenine. Taken together, wheat and *Pgt* both produce two distinct siRNA classes during infection. One class prefers a 5' uracil (21 nt miRNAs in wheat and 20-21 nt siRNAs in *Pgt*) and the other prefers a 5' adenine (24 nt siRNAs in wheat and 22 nt siRNAs in *Pgt*).

**Table 3:** Predicted miRNAs and siRNAs in *Pgt* and wheat and their properties.

|                      | <i>Pgt</i> siRNAs | <i>Pgt</i> miRNAs | Wheat siRNAs      | Wheat miRNAs      |
|----------------------|-------------------|-------------------|-------------------|-------------------|
| # of sRNAs           | 4,593             | 6                 | 394               | 51                |
| 5' adenine           | 31%               | 66.7%             | 26.7%             | 9.8%              |
| 5' cytosine          | 3.7%              | 0%                | 16.8%             | 3.9%              |
| 5' guanine           | 0.7%              | 0%                | 9.4%              | 9.8%              |
| 5' uracil            | 64.6%             | 33.3%             | 47.2%             | 76.5%             |
| 20 nts (5' A   5' U) | 25.9% (16%   76%) | 0%                | 9.9% (13%   77%)  | 13.7% (0%   100%) |
| 21 nts (5' A   5' U) | 36.1% (19%   77%) | 16.7% (0%   100%) | 50.3% (21%   49%) | 68.6% (14%   69%) |
| 22 nts (5' A   5' U) | 32.4% (53%   45%) | 83.3% (80%   20%) | 15.5% (28%   61%) | 15.7% (0%   88%)  |
| 24 nts (5' A   5' U) | 0%                | 0%                | 20.3% (45%   24%) | 0%                |

### *Pgt* induces early and late waves of sRNAs during infection, whereas most wheat sRNAs are not differentially expressed

Next, we assessed the differential expression of *Pgt* sRNAs at the start of infection (germinated spores), during early infection when haustoria are present inside the plant cells (3 dpi and 5 dpi) and during late infection when sporulation begins (7 dpi). We detected no differential expression of *Pgt* sRNAs between 3 dpi and 5 dpi, likely due to the low number of mapped reads (Table 2). Strikingly, 3,963 of the 4,599 *Pgt* sRNA clusters are predicted as differentially expressed (86.2%), with 1,631 up-regulated in germinated spores, 188 up-regulated during early infection (3 dpi and 5 dpi) and 2,364 up-regulated during late infection (Figure 3, Supplementary Files S5-S8). The six predicted *Pgt* miRNAs are all up-regulated in germinated spores compared to late infection. A large proportion of sRNAs (80.2%; 1,897 of 2,364) are up-regulated during late infection compared to all the other conditions (germinated spores, 3 dpi and 5 dpi). In contrast, the majority of sRNAs that are up-regulated in germinated spores (85.1%; 1,388 of 1,631) are down-regulated in late infection and not at 3 dpi or 5 dpi. This indicates that the sRNAs up-regulated during late infection are highly specific to that time point.

In contrast to *Pgt*, which exhibits prominent waves of sRNA expression during infection, only 19 of the 394 wheat sRNAs (4.8%) are predicted to be differentially expressed. Amongst these 19 differentially expressed wheat sRNAs is only one predicted miRNA, but it does not have a match to a known miRNA in the RNACentral database (Consortium, 2016). Taken together, a major switch in *Pgt* sRNA expression occurs between the start of infection (germinated spores) and the late infection stage, coinciding with the differential expression of several RNAi genes (Figure 1).

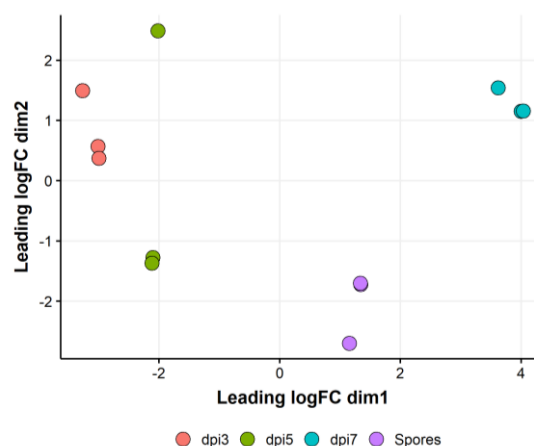

(A)

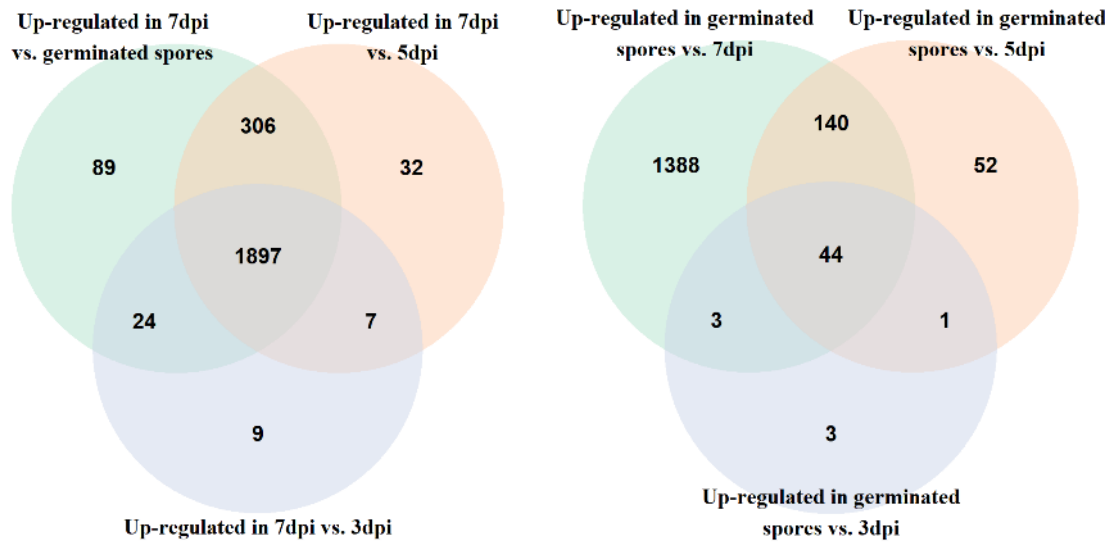

(B)

**Figure 3: *Pgt* sRNA differentially expression analysis.** (A) A multi-dimensional scaling plot using the edgeR package shows the clustering of the replicates for the different samples. The 3 dpi and 5 dpi samples show less differences in expression than the germinated spores and 7 dpi samples. (B) Venn diagrams of up-regulated *Pgt* sRNAs shared between the different time points: germinated spores, early infection (3 dpi and 5 dpi) and late infection (7 dpi). Two major classes of sRNAs occur: one that is up-regulated during late infection ( $n = 1,897$ ) and one that is up-regulated in germinated spores compared to late infection ( $n = 1,388$ ).

### The late wave *Pgt* sRNAs are predominantly 22 nt in length with a 5' adenine

We assessed the length distributions and 5' nucleotide preferences of differentially expressed *Pgt* sRNAs (Figure 4A). *Pgt* sRNAs up-regulated during early infection or in germinated spores are predominantly 21 nts in length (55.9% and 48.3%, respectively). In contrast, the largest class (43.5%) of the *Pgt* sRNAs up-regulated during late infection are 22 nt in length. *Pgt* sRNAs with no detected differential expression follow a similar size distribution pattern to those that are up-regulated in germinated spores and early infection, with 21 nt sRNAs being the most prevalent class (47.6%, Figure 4A). The majority of the 20-22 nt sRNAs up-regulated in germinated spores, during early infection and those with no differential expression contain a 5' uracil (Figure 4B). This is also true for 21 nt sRNAs up-regulated during late infection. However, in contrast, the 22 nt sRNAs that are up-regulated during late infection have a strong preference for 5' adenines. This resembles the occurrence of 24 nt siRNAs with a 5' adenine in plants and suggests the specific induction of a different functional class of sRNAs during these late infection stages.

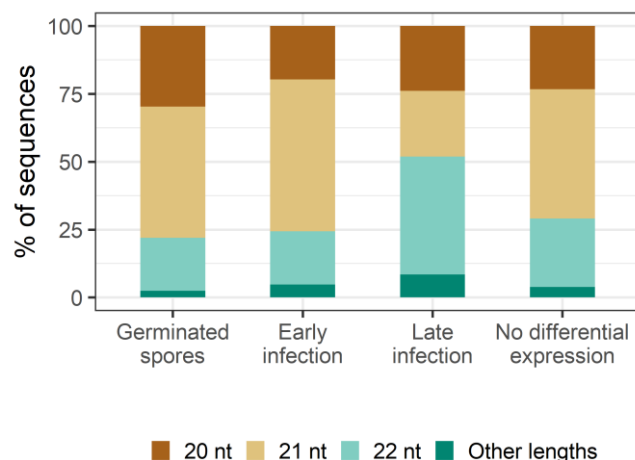

(A)

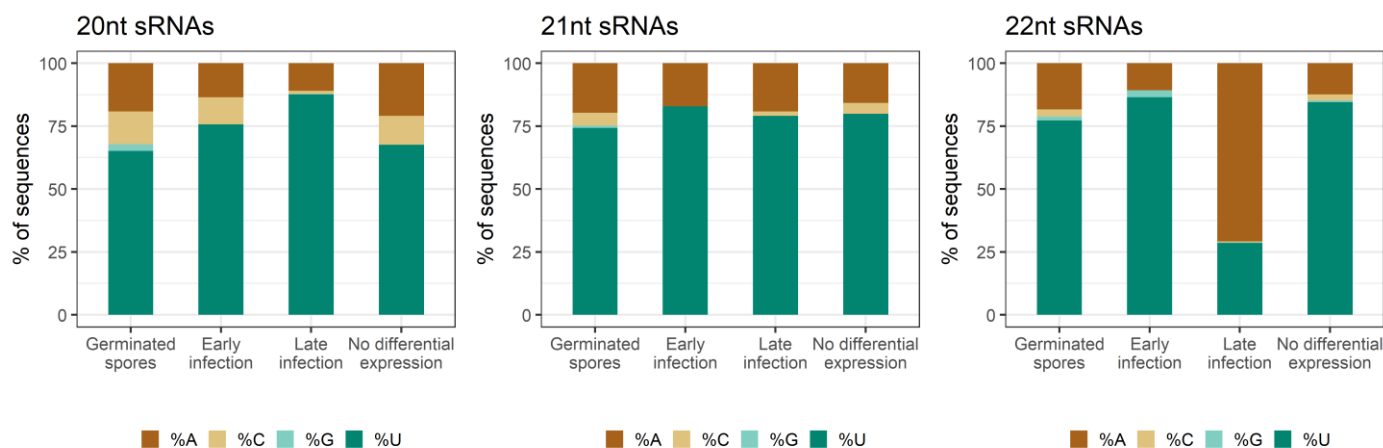

243

244 **Figure 4:** (A) Sequence lengths and (B) 5' nucleotide distribution of *Pgt* sRNAs. *Pgt* sRNAs up-regulated during late  
 245 infection differ in length distribution and 5' nucleotide preference to the remaining *Pgt* sRNAs. 22 nt *Pgt* sRNAs up-  
 246 regulated during late infection prefer a 5' adenine, which is not observed for 22 nt sRNAs expressed in the other  
 247 conditions.

248 **The early wave *Pgt* sRNAs are mostly produced from genes and are conserved across the haplotypes**

249 We further investigated the locations of the *Pgt* sRNAs on the chromosomes and found that similar proportions  
 250 occur in each of the two haplotypes (Table 5). We then assessed if sRNAs have a homologous counterpart.  
 251 For this we re-mapped the sequencing reads that define a sRNA locus to the remainder of the genome. The  
 252 sRNA locus that has the highest coverage by those mapped reads is assigned as the homologous counterpart.  
 253 Around two-thirds of sRNAs up-regulated in germinated spores have a homologous counterpart (66.1%, Table  
 254 5). Almost half of these homologous pairs are located on the corresponding haplotype chromosomes (82.6%).  
 255 In contrast, around half of sRNAs up-regulated during late infection have a homologous counterpart (54.5%),  
 256 but only 25.4% of these homologous pairs are located on corresponding haplotype chromosomes. The  
 257 homologous counterparts of sRNAs up-regulated in germinated spores appear to be in synteny for the two  
 258 haplotype chromosomes, as shown in Figure 5 for sRNAs on chromosome 1A. This suggests that most early  
 259 infection induced sRNAs are conserved across the haplotypes.

260 **Table 5: Genomic origins of *Pgt* sRNAs.** The *Pgt* sRNAs map in similar proportions to the two haplotypes. More than  
 261 half of sRNAs are conserved and have a homologous counterpart.

|                                                                | Up-regulated<br>in germinated<br>spores | Up-regulated<br>during early<br>infection | Up-regulated<br>during late<br>infection | No<br>differential<br>expression |
|----------------------------------------------------------------|-----------------------------------------|-------------------------------------------|------------------------------------------|----------------------------------|
| # of sRNAs                                                     | 1,631                                   | 188                                       | 2,364                                    | 636                              |
| On chromosomes A                                               | 50.6%                                   | 47%                                       | 50.3%                                    | 52.2%                            |
| On chromosomes B                                               | 49.5%                                   | 53%                                       | 49.7%                                    | 47.8%                            |
| sRNAs with homologous counterpart                              | 66.1%                                   | 72.1%                                     | 54.5%                                    | 51.7%                            |
| Homologous counterpart is on alternate<br>haplotype chromosome | 82.6%                                   | 87.9%                                     | 25.4%                                    | 48.8%                            |
| Mapping to repeats                                             | 7.73%                                   | 7.98%                                     | 38.66%                                   | 19.34%                           |
| Mapping to genes                                               | 57.51%                                  | 64.89%                                    | 15.95%                                   | 44.34%                           |
| <b>Genomic origin of sRNAs from repetitive regions</b>         |                                         |                                           |                                          |                                  |
| Gypsy LTR retrotransposons                                     | 29.2%                                   | 17.6%                                     | 30.5%                                    | 29.4%                            |
| Copia LTR retrotransposons                                     | 22.9%                                   | 47.1%                                     | 22.7%                                    | 15.4%                            |
| DNA/hAT transposons                                            | 3.5%                                    | 0%                                        | 4.4%                                     | 16.1%                            |
| DNA/MULE-MuDR transposons                                      | 1.4%                                    | 0%                                        | 8.7%                                     | 2.1%                             |
| Unknown repeat class                                           | 27.1%                                   | 0%                                        | 8.5%                                     | 10.5%                            |
| LINE/Tad1                                                      | 3.5%                                    | 11.8%                                     | 2%                                       | 7%                               |

262



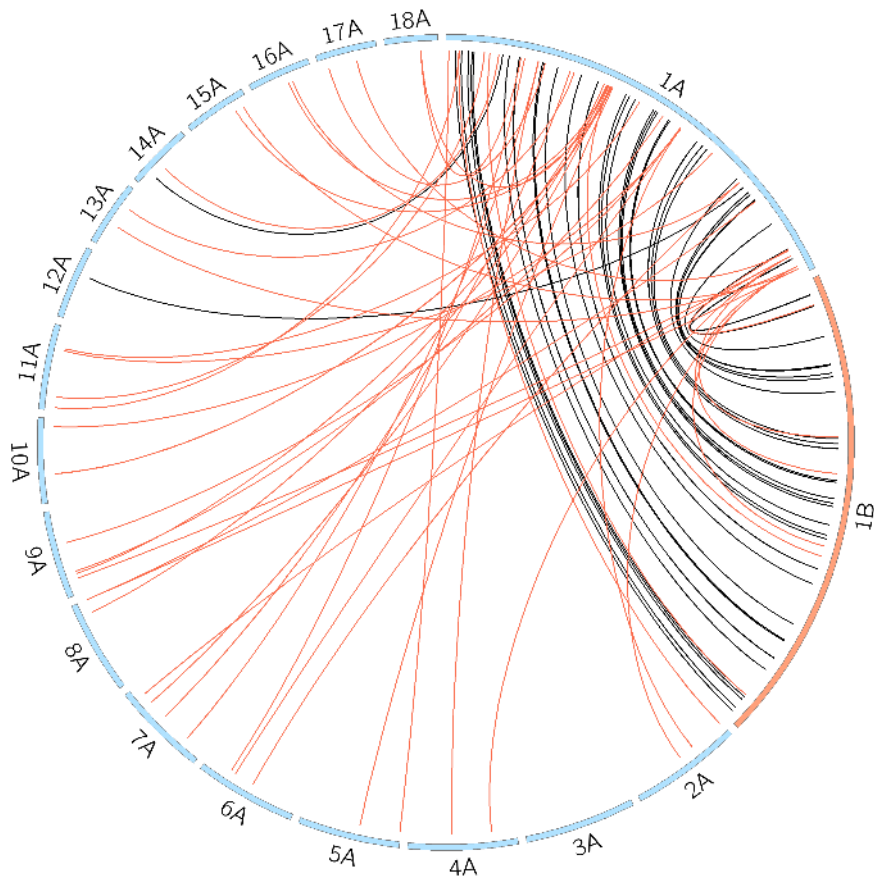

263

264 **Figure 5: *Pgt* allelic sRNA pairs and their genomic localization for chromosome 1A.** *Pgt* sRNAs that are up-  
 265 regulated in germinated spores (late infection) and their homologous counterparts are shown with black (red) links.  
 266 sRNAs that are up-regulated in germinated spores appear to be in syntenic on the two haplotype chromosomes 1A and  
 267 1B (shown at twice their size, other chromosomes shown at 0.2 their size). In contrast, sRNAs that are up-regulated  
 268 during late infection have homologous counterparts on all other chromosomes except 3A and 12A.

269 The late wave *Pgt* sRNAs exhibit opposing genomic locations to the early wave sRNAs (Table 5). *Pgt* sRNAs  
 270 up-regulated in germinated spores and during early infection predominantly map to genes (57.5% and 64.9%,  
 271 respectively), compared to only 16% of sRNAs up-regulated during late infection. *Pgt* sRNAs induced during  
 272 late infection are largely generated from repetitive elements (38.7%), in contrast to the early wave sRNAs  
 273 (7.7% and 8%). Most of the repetitive elements associated with sRNAs belong to the class of LTR  
 274 retrotransposons, particularly Gypsy elements.

275

276 A gene function ontology (GO) term analysis of the 1,004 genes that are associated with *Pgt* sRNAs up-  
 277 regulated in germinated spores reveals an enrichment in proteins with protein kinase activity as well as proteins  
 278 with ATP and DNA binding activity (Table 6). Interestingly, genes that produce *Pgt* sRNAs up-regulated in  
 279 germinated spores are also enriched for proteins with histone methyltransferase activity. The enrichment  
 280 analysis indicates a potential role of *Pgt* sRNAs in regulation of signal transduction and transcription during  
 281 spore germination. No significant enrichment in functional annotation was observed for genes that produce  
 282 sRNAs with no differential expression, or sRNAs up-regulated during early or late infection.

283 **Table 6: *Pgt* genes that are associated with sRNAs up-regulated in germinated spores and their functional GO**  
 284 **term enrichment.** We assessed GO term enrichments of the annotated molecular function of *Pgt* genes that are  
 285 associated with sRNAs compared to all other *Pgt* genes (FDR < 0.00001).

| Enriched GO term category                                                      | False discovery rate (FDR) | # of genes |
|--------------------------------------------------------------------------------|----------------------------|------------|
| <b>Genes that are associated with smRNAs up-regulated in germinated spores</b> |                            |            |
| Protein kinase activity                                                        | $8 \times 10^{-11}$        | 50         |
| Histone methyltransferase activity (H3-K4 specific)                            | $8 \times 10^{-11}$        | 9          |

|                                            |                     |    |
|--------------------------------------------|---------------------|----|
| DNA binding                                | $2 \times 10^{-10}$ | 83 |
| ATP binding                                | $4 \times 10^{-7}$  | 95 |
| RNA-directed 5'-3' RNA polymerase activity | $2 \times 10^{-6}$  | 11 |

286

287

## The late wave *Pgt* sRNAs are produced from repetitive elements in the centromeric regions

288

289

290

291

292

293

294

295

296

297

298

299

We further assessed the location of sRNAs on the chromosomes in the context of gene and repeat density. We observed a clustering of late wave sRNAs in genomic regions with low gene density and high repeat density (Figure 6) and suspected that these regions might correspond to centromeres. Transcriptionally inactive chromatin (heterochromatin) is vital to maintain the integrity of the centromeres and is typically gene-poor, highly condensed and repetitive. We used chromatin conformation capture assay data (Hi-C) from *Pgt* 21-0 (Li *et al.*, 2019) to pinpoint the location of the *Pgt* centromeres. Fungal centromeres tend to cluster in the three-dimensional space and are visible as a distinct outwards-spreading shape in a Hi-C contact map (Varoquaux *et al.*, 2015), as seen in the contact map for the chromosomes of each haplotype (Figure 7). For example, the *Pgt* chromosome 1A has a centromere around position 2.36 MB and chromosome 1B at around position 2.62 MB (Figure 7). For both chromosomes 1A and 1B, a single assembled contig spans the centromeric region and an alignment shows no to very low sequence identity in that region, as opposed to the remainder of the chromosome.

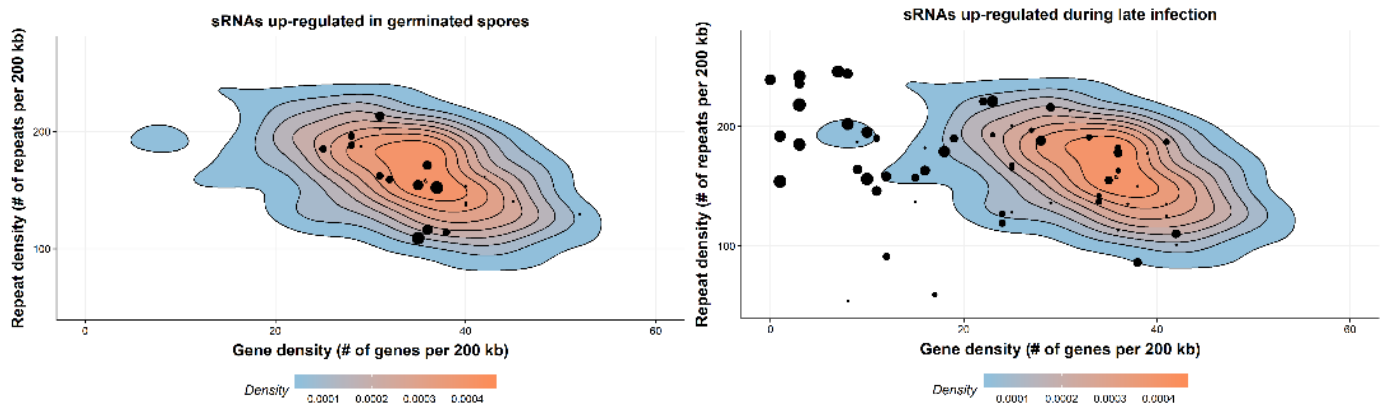

300

301

302

303

304

305

306

**Figure 6: *Pgt* sRNAs and their genomic localization.** Gene density and repeat density is plotted for 200 kb windows as density plots, where red corresponds to the highest occurrence of points. The majority of the *Pgt* genome sequence has gene density of ~30-40 genes per 200 kb and repeat density of ~150-200 repeats per 200 kb. *Pgt* sRNAs are shown as black dots, with the size of the dot corresponding to the number of distinct sRNAs. *Pgt* sRNAs up-regulated in germinated spores are located in relatively gene-dense regions, whereas sRNAs up-regulated during late infection reside in gene-sparse, repeat-rich regions of the genome.

307

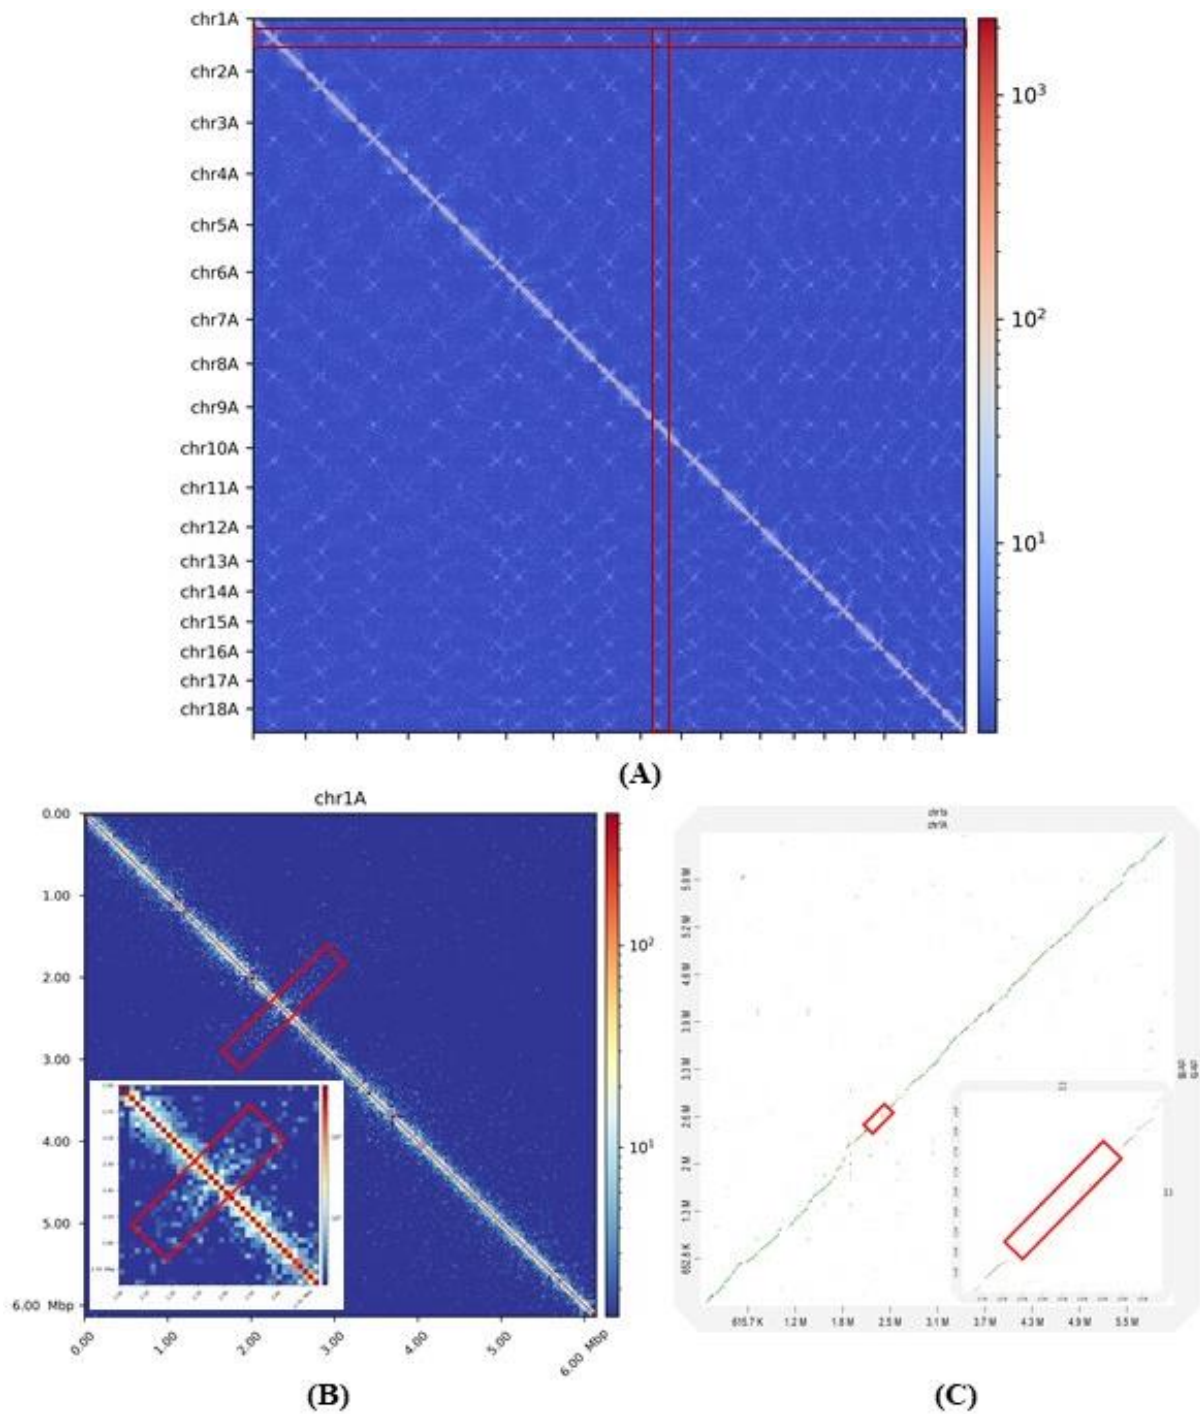

308

309 **Figure 7: Hi-C contact maps show the location of the *Pgt* centromeres.** (A) A Hi-C contact map of the 18  
310 chromosomes in haplotype A shows the position of the centromeres as cross-like shapes, highlighted with a red  
311 rectangle. (B) Hi-C contact map of *Pgt* chromosome 1A. The centromeric region can be seen at around position 2.36  
312 MB and is highlighted with a red box. (C) Dot-plot genomic alignment of *Pgt* chromosomes 1A and 1B. The centromeric  
313 region displays no to very low sequence identity between the two chromosomes.

314

315 Alignment of gene expression data (germinated spores, haustorial tissue and wheat infection 2-7 dpi) to the  
316 chromosomes shows that centromeric regions are transcriptionally silent, gene-poor and appear to span at least  
317 200 kb (Figure 8). We assessed the density of the sRNA sequencing reads along the *Pgt* chromosomes in  
318 germinated spores and during late infection. The reads from the late infection samples (7 dpi) form a prominent  
319 cluster on each chromosome, whereas the reads from the germinated spore samples appear to be fairly evenly  
320 distributed on each chromosome (Figure 8). Strikingly, on each chromosome the sRNAs up-regulated at 7 dpi  
321 are derived from centromeres (Supplementary Figure S9). We assessed the repeat content of the predicted

322 centromeric regions. All of the 2\*18 *Pgt* centromeres have a higher repeat content than the non-centromeric  
323 regions (Figure 8). The average GC content of the centromeric regions is 42.2%, compared to 43.6% of the  
324 non-centromeric regions. The most abundant repeat types in the centromeric regions are LTR  
325 retrotransposons, unknown repeats, DNA MULE-MuDR elements and LTR copia retrotransposons. LTR  
326 retrotransposons are particularly abundant and occupy on average 25.4% of the centromeric regions, as  
327 opposed to 9.8% of non-centromeric regions (Figure 8).

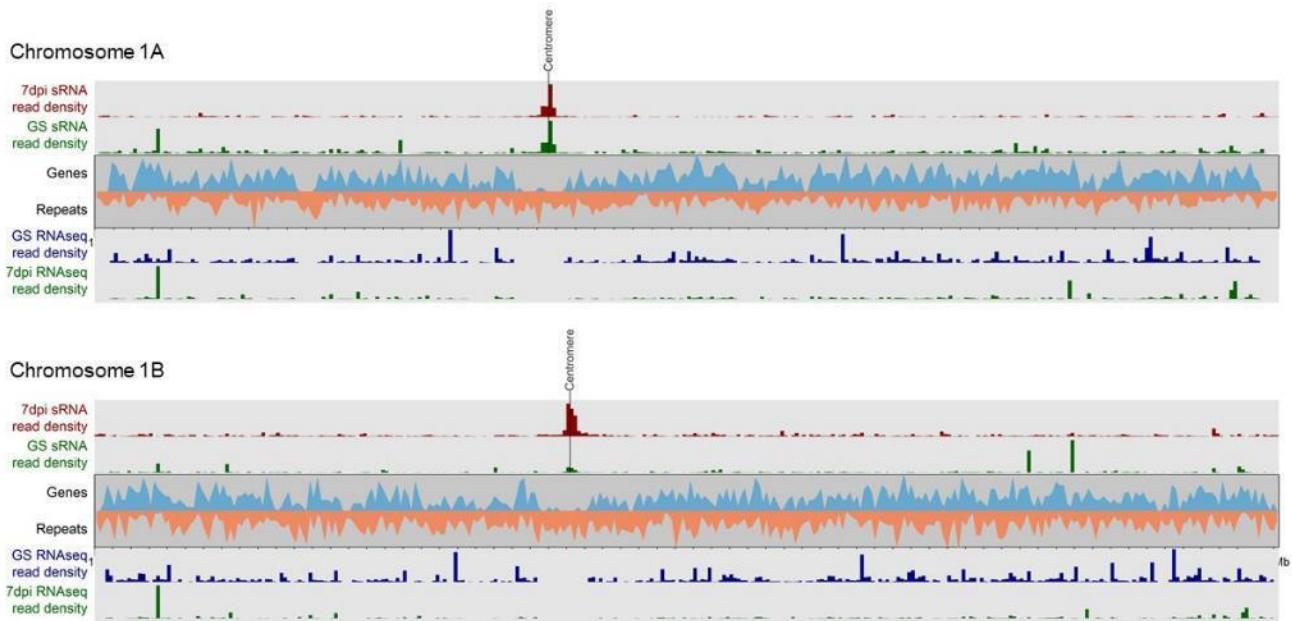

328

329

(A)

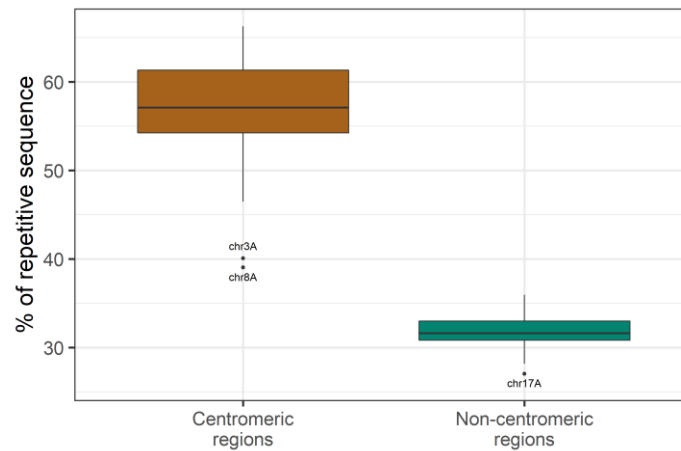

330

331

(B)

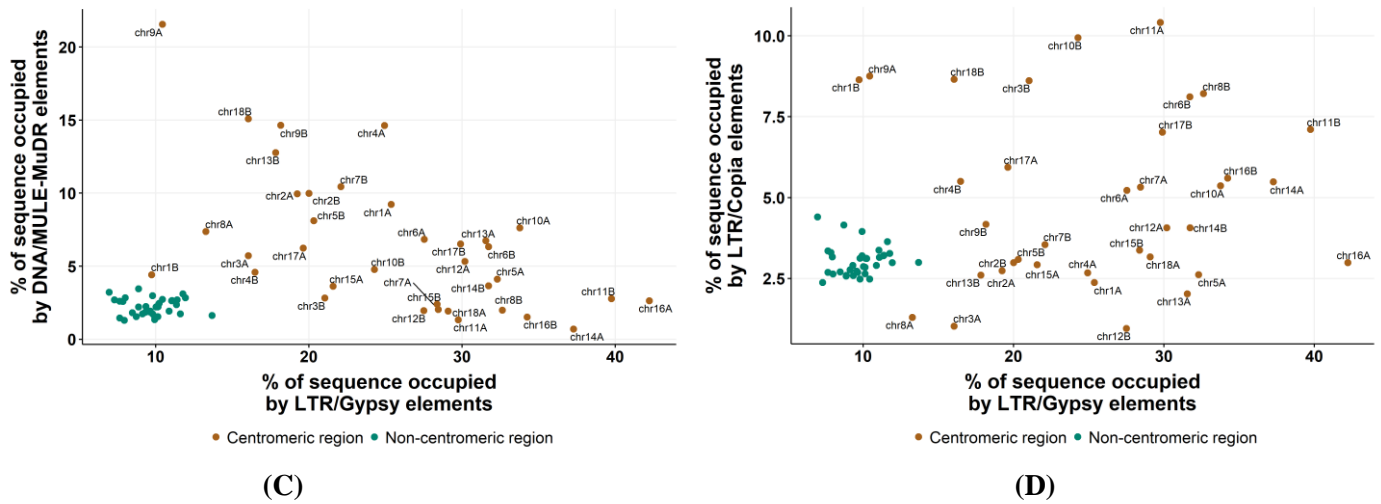

332  
333

334 **Figure 8: Properties of *Pgt* centromeric regions.** (A) Karyoplots of *Pgt* chromosomes 1A and 1B. The density  
335 distributions of sRNAs, repeat elements, expressed genes and RNAseq reads in germinated spores and at 7 dpi are shown  
336 for chromosomes 1A and 1B (20 kb windows, GS: germinated spores). *Pgt* sRNAs upregulated during late infection  
337 originate from the repeat-rich, gene-poor and transcriptionally silent centromeric regions. (B) The repeat content of  
338 centromeric regions is compared to the repeat content of non-centromeric regions for each *Pgt* chromosome. (C-D) The  
339 repeat content of *Pgt* centromeric regions are shown for different classes of repeats (DNA/MULE-MuDR transposons,  
340 LTR/Gypsy retrotransposons and LTR/Copia retrotransposons). Centromeres are not all enriched for the same type of  
341 repetitive element and repeat content differs between the alternate haplotype chromosomes.

342

### 343 TEs targeted by late infection sRNAs are associated with reduced expression of overlapping genes

344 Small RNAs and associated repeats can play an important role in transcriptional regulation of neighboring  
345 genes. Thus, we aimed to test if transposable elements (TEs) targeted by *Pgt* sRNAs have a silencing effect  
346 on nearby genes. We re-mapped *Pgt* sRNAs that are up-regulated during late infection without mismatches to  
347 the chromosomes. We labelled a TE as sRNA+TE if an up-regulated sRNA maps to it and as sRNA-TE if no  
348 up-regulated sRNA maps to it. To investigate the relationship between TE proximity and gene expression, we  
349 measured the distance from a gene to its nearest neighboring TE, including both upstream and downstream  
350 TEs. We then separated genes into two groups, one group containing genes with the closest TE being a  
351 sRNA+TE and the other group containing genes with the closest TE being a sRNA-TE.

352 We then assessed the average gene expression levels at late infection (7 dpi) and compared the different groups  
353 (Figure 9). When a TE was overlapping with or contained within a gene, then genes with a sRNA+TE were  
354 expressed at significantly lower levels, on average, than genes with a sRNA-TE. We then repeated this  
355 experiment with *Pgt* sRNAs that are up-regulated in germinated spores and assessed the average gene  
356 expression levels in germinated spores. We did not observe a significant effect on the expression of nearby  
357 genes (Figure 9). This suggests that the proximity to a sRNA+TE or a sRNA-TE has a significant effect on  
358 the expression of genes that overlap with TEs, and that sRNA+TEs are actively silenced by the siRNAs during  
359 late infection which leads to reduced expression of the associated genes.

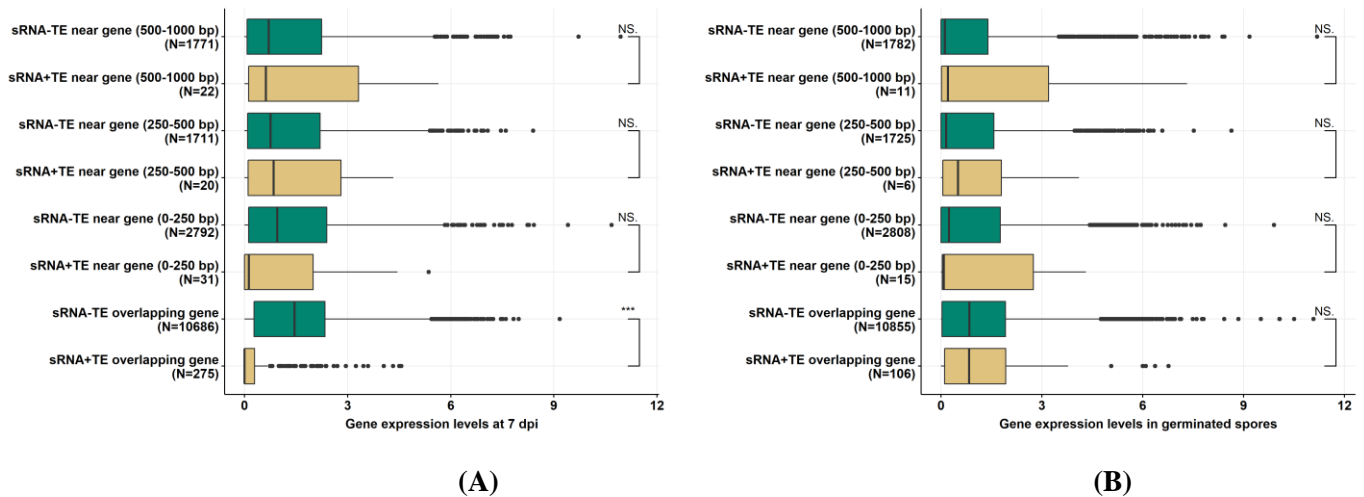

**Figure 9: Expression levels (*log*-normalized transcripts for million) for genes in each bin of increasing distance from the nearest TE that is predicted to be either targeted by a *Pgt* sRNA or not. (A) Genes that fully or partially contain a TE targeted by a sRNA induced at 7dpi (sRNA+TE) appear silenced when compared to genes that fully or partially contain a TE not targeted by a sRNA (sRNA-TE). (B) This effect was not observed for sRNAs induced in germinated spores. The total number of observations in each group (N) is shown on the y-axis.**

## Discussion

Small RNAs play a vital role in regulation of gene expression and in plant-pathogen crosstalk (Weiberg *et al.*, 2014). Previous studies on small RNA characterization in fungal plant pathogens mostly rely on sequencing of one time point of infection, which obscures the expression profiles of pathogen sRNAs over a time course of infection. For example, a previous study in the wheat stripe rust fungus (*Puccinia striiformis* f.sp. *tritici*) sequenced sRNAs at 4 dpi and found that the majority (75 %) of the predicted 20–22 nt *Pst* sRNAs carry a 5' uracil (Mueth *et al.*, 2015). The presence of distinct sRNA profiles in mycelia and appressoria tissues was suggested in the rice blast fungal pathogen, *Magnaporthe oryzae* (Nunes *et al.*, 2011). However, prominent waves of sRNA expression profiles during fungal infection of plants have thus far not been reported. Through small RNA sequencing over a time course of *Pgt*-wheat infection, we uncovered that *Pgt* produces two distinct sRNA profiles during infection.

*Pgt* sRNA expression appears to be under tight temporal control, with 86.2% of *Pgt* sRNAs differentially expressed over the time course, compared to only 4.8% of wheat sRNAs. In germinated spores and during early infection, *Pgt* sRNAs predominantly overlap with gene models and are 21 nts in length with a 5' uracil. A switch to 22 nt *Pgt* sRNAs with a 5' adenine occurs during late infection, which coincides with formation of new urediniospores, and these 22 nt sRNAs are mostly produced from repetitive elements located in the centromeres. The presence of two distinct sRNA profiles and their differential expression during rust developmental stages has thus far not been observed and indicates functional diversification of the RNAi machinery, with a strong role in the infection and proliferation process.

Many 22 nt *Pgt* sRNAs with a 5' adenine are derived from centromeric TEs, suggesting that their primary role is in maintaining genome stability during formation of new urediniospores. The specific expression of one argonaute, one dicer and two RdRPs at the late stage of infection underlines their involvement in such a functionally diversified TE silencing pathway. This is similar to what has been reported in plants which produce PTGS-associated 20-22 nt miRNAs/siRNAs and 24 nt heterochromatic sRNAs that differ in modes of biogenesis and function (Kamthan *et al.*, 2015). In plants, TEs are silenced mainly by transcriptional gene silencing (TGS) via 24 nt small RNA-directed DNA methylation (RdDM) (Borges & Martienssen, 2015). These 24 nt sRNAs are most abundant during seed development in plants, presumably to ensure stable inheritance of the genome. We speculate that the majority of 22 nt *Pgt* sRNAs are responsible for silencing of repetitive elements and the majority of 21 nt *Pgt* sRNAs for PTGS.

397 The up-regulation of 22 nt sRNAs with enrichment for 5' adenine during late infection coincides with the up-  
398 regulation of the argonaute A gene. Similarly, the preferential accumulation of 21 nt 5' uracil sRNAs in  
399 germinated spores and during early infection correlates with high-level expression of argonaute B and  
400 relatively low level expression of argonaute A. This suggests that similar to plants, the 5' nucleotide of *Pgt*  
401 sRNAs might have a strong effect on preferential loading into different argonautes. In *Arabidopsis thaliana*,  
402 AGO1 and AGO10 bind preferentially small RNAs with a 5' uracil, whereas AGO2, AGO4, AGO6, AGO7  
403 and AGO9 prefer sRNAs with 5' adenines and AGO5 5' cytosines (Borges & Martienssen, 2015). The results  
404 on developmental variations in the different *Pgt* sRNAs and argonautes from our analysis suggest that  
405 argonaute B preferentially loads sRNAs with a 5' uracil and argonaute A preferentially binds 22 nt sRNAs  
406 with a 5' adenine.

407 The high activity of 22 nt sRNAs in the later stages of infection might ensure that the genome is passed on  
408 stably to subsequent generations through methylation and condensation of centromeres. The TE silencing  
409 function can be hijacked by some genes for regulation and we showed that this occurs in *Pgt* genes that contain  
410 or overlap with sRNA-targeted TEs. In plants, insertion of TE near genes can provide cis-elements for stress  
411 responsive or tissue-specific expression, and the expression level can be modulated by DNA methylation  
412 and/or histone modification at the TEs. It is likely that a similar DNA methylation or histone modification  
413 mechanism exists in *Pgt*, which is worthy of investigation in future studies.

414 Using the ShortStack software which uses criteria tailored to plant miRNA properties, we predicted only a  
415 handful of *Pgt* sRNAs that fulfil the criteria for miRNAs. However, it is possible that *Pgt* produces a larger  
416 contingent of miRNA-like RNAs that follow currently unknown fungal-specific rules. For example, plant and  
417 animal miRNAs are different in many respects such as in their degree of complementarity to their target  
418 mRNA (Millar & Waterhouse, 2005). Loci with some, but insufficient, evidence for miRNA biogenesis (such  
419 as strandedness) using ShortStack might be worth exploring as miRNA-like candidates in the future (Axtell  
420 *et al.*, 2011). We did not perform target prediction of *Pgt* sRNAs due to the lack of fungal-specific targeting  
421 rules and the high false positive rate of miRNA target prediction tools (Dai *et al.*, 2018). In future studies,  
422 small RNA-sequencing specifically of haustorial tissues can help to elucidate if haustoria are the sites of sRNA  
423 transfer between host and pathogen (Shahid *et al.*, 2018) and we can combine target prediction with gene  
424 expression data to reduce the number of false positive predictions.

## 425 **Materials and Methods**

### 426 **Small RNA sequencing, read processing, filtering and alignment**

427 For rust infection, host plants (cv. Sonora) were grown at high density (~25 seeds per 12cm pot with compost  
428 as growth media) to the two leaf stage (~7 days) in a growth cabinet set at 18-23°C temperature and 16 h light.  
429 Spores (-80°C stock) were first thawed and heated to 42°C for 3 minutes, mixed with talcum powder and  
430 dusted over the plants. Pots were placed in a moist chamber for 24 hours and then transferred back to the  
431 growth cabinet. Leaf samples were harvested at specified days after inoculation, snap frozen and stored at -  
432 80°C until use. 100 mg freshly collected spores were germinated overnight in four 15 cm petri dishes, each  
433 containing 200ml sterile RO water. Germinated spores were harvested via filtering through nylon mesh 15  
434 µm. Small RNAs were extracted from the germinated spores and infected leaf samples with the Purelink  
435 microRNA Isolation Kit from Invitrogen. We sequenced sRNAs (50 bp reads) from the following five  
436 conditions (3 replicates each) on the Illumina HiSeq: germinated spores, uninfected wheat and infected wheat  
437 at 3 dpi, 5 dpi and 7 dpi. Adapters were trimmed using cutadapt (-m18 -M28 -q30 -trim-n -discard-  
438 untrimmed) (Martin, 2011). Untrimmed reads, reads shorter than 18 nts or reads larger than 28 nts were  
439 discarded and flanking N bases were removed from each read (Martin, 2011). FASTQC was run on the  
440 resulting reads (<http://www.bioinformatics.babraham.ac.uk/projects/fastqc/>).

441 To eliminate reads derived from non-small RNAs, we first generated a database set of potential contaminating  
442 RNA sources. *Triticum aestivum* and *Puccinia* tRNAs, rRNAs and spliceosomal RNAs were collected from  
443 the RNACentral database (Consortium, 2016) as well as the tRNA and rRNA RFAM families RF00001,  
444 RF00002, RF00005, RF01852, RF01960 and RF02543 (Nawrocki *et al.*, 2015), snoRNAs from dbsnOPY, 5S  
445 and 23S ribosomal RNAs from the European Nucleotide Archive (ENA) and the tRNA/rRNA file from the  
446 sRNA workbench (Stocks *et al.*, 2012). This set of potential contaminant sequences was de-duplicated using

447 bbmap and its tool dedupe.sh (sourceforge.net/projects/bbmap/). Reads that mapped to this set were removed  
448 using bowtie 1.1.2 (Langmead *et al.*, 2009). To assess read length distributions across the different samples,  
449 clean small RNA reads were mapped to the wheat genome IWGSC RefSeq v1.0 (International Wheat Genome  
450 Sequencing *et al.*, 2018) and *Pgt* 21-0 genome (Li *et al.*, 2019) using bowtie 1.1.2 (alignment settings: no  
451 mismatches allowed -v0; report all alignments: -a -best -strata; suppress all alignments with more than 100  
452 reportable alignments: -m100).

### 453 **Gene expression analysis and repetitive element prediction**

454 From the same infected leaf samples, previously published RNA-sequencing data (0 dpi, 2 dpi, 3 dpi, 4 dpi, 5  
455 dpi, 6 dpi, 7dpi) was used for the gene expression analysis (Chen *et al.*, 2017). This was complemented with  
456 previously published RNA-sequencing data of *Pgt* 21-0 germinated spores and haustorial tissue (Upadhyaya  
457 *et al.*, 2014). We used Salmon 0.12.0 to align reads to the *Pgt* 21-0 transcripts (Li *et al.*, 2019) and to estimate  
458 transcript abundances in each sample. We used tximport and DESeq2 to assess gene differential expression  
459 (Love *et al.*, 2014; Sonesson *et al.*, 2015). Differentially expressed genes were annotated with the B2GO  
460 software and GO term enrichment analyses were performed with B2GO and the category molecular function  
461 (Gotz *et al.*, 2008). Secreted proteins were predicted using SignalP 4 (Petersen *et al.*, 2011).

462 Repetitive sequences on the *Pgt* chromosomes were predicted using RepeatModeler 1.0.11. We filtered repeat  
463 libraries built with RepeatModeler for non-TE protein-coding sequences using the procedure described in  
464 <https://blaxter-lab-documentation.readthedocs.io/en/latest/filter-repeatmodeler-library.html>. The predicted  
465 repeat library was merged with the RepeatMasker database version 20160829. Repeats were then predicted  
466 using the combined library and RepeatMasker 4.0.6.

### 467 **Hi-C data analysis**

468 Previously published Hi-C data (Li *et al.*, 2019) available in NCBI under BioProject PRJNA516922 was  
469 analyzed using HiC-Pro 2.11.1 (Servant *et al.*, 2015) and contact maps were plotted with HiCExplorer's  
470 hicPlotMatrix (Ramirez *et al.*, 2018) to identify centromeric regions.

### 471 ***Pgt* sRNA prediction, differential expression analysis and allelic sRNA prediction**

472 To annotate and quantify high-confidence *Pgt* and wheat small RNAs from the sequencing data, we used the  
473 ShortStack 3.8.5 software (Axtell, 2013) on the clean sRNA reads, allowing no mismatches (--bowtie\_m 100,  
474 -v0). We further filtered the predicted sRNA clusters to include only those where  $\geq 80\%$  of reads are within  
475 20-24 nts of length (recommended procedure in ShortStack to avoid degradation products) and where the  
476 cluster has  $\geq 5$  reads per million. The ShortStack software outputs sRNA cluster properties such as the most  
477 abundant sRNA (termed sRNA candidate) in the cluster, strandedness of the locus, miRNA annotation and  
478 phasing (Axtell, 2013). Strandedness of sRNA loci is determined by forcing the bowtie aligner to select one  
479 strand or the other with a probability that is proportional to the number of best sites on the strand. Stranded  
480 loci are typical of miRNA production in plants and are a requirement for annotation of a locus as a miRNA  
481 by ShortStack. We used the read counts returned by ShortStack for all predicted sRNA clusters and used  
482 edgeR (Robinson *et al.*, 2010) to assess which are differentially expressed at any of the infection stages versus  
483 germinated spores (FDR < 0.05, fold change > 2).

484 All plots were produced using Ggplot2 (Wickham, 2009) and statistical significance was assessed with *t*-tests  
485 using the ggsignif package (<https://cran.r-project.org/web/packages/ggsignif/index.html>). Significance  
486 thresholds according to *t*-test are: NS, not significant; \*, < 0.05; \*\*, < 0.01; \*\*\*, < 0.001.

487 To assess if sRNAs have a homologous counterpart, we re-mapped the sequencing reads that define a sRNA  
488 locus to the remainder of the genome using bowtie 1.1.2 (alignment settings: two mismatches allowed -v2;  
489 report all alignments: -a -best -strata; suppress all alignments with more than 100 reportable alignments: -  
490 m100). If more than 25% of bases in a sRNA locus are covered by those mapped reads (using bedtools  
491 coverage version 2.28.0), it is marked as a candidate homolog. The sRNA locus with the highest coverage  
492 amongst the candidate homologs is returned as the predicted allelic counterpart. Circos 0.69.5 (Krzywinski  
493 *et al.*, 2009) was used to plot the links between homologous sRNAs across the chromosomes.



494 The genomic origins of sRNAs was assessed using bedtools intersect -f 0.25 -F 0.25 and the genomic  
495 coordinates of the sRNA loci and the TEs/gene annotations.

496 To assess the relationships of sRNAs and TEs, we re-mapped up-regulated sRNAs to the genome using bowtie  
497 1.1.2 (alignment settings: no mismatches allowed -v0; report all alignments: -a -best -strata; suppress all  
498 alignments with more than 100 reportable alignments: -m100). We reported repeats that overlap with those  
499 mapped sRNAs using bedtools intersect -a and those that do not overlap with mapped sRNAs using bedtools  
500 intersect -v. We then retrieved the genes that overlap with repeats using bedtools closest.

## 501 Availability of data and material

502 All scripts as well as code for generating the figures of this paper are available at  
503 [https://github.com/JanaSperschneider/Publications\\_Code/2019\\_12\\_StemRust\\_smRNA\\_Paper](https://github.com/JanaSperschneider/Publications_Code/2019_12_StemRust_smRNA_Paper). Sequence  
504 data for the *Pgt* infection RNAseq is available at the National Center for Biotechnology Information  
505 Sequencing Read Archive under bioproject PRJNA415866. Sequence data for the *Pgt* small RNAseq is  
506 available at CSIRO Data Access Portal under <https://doi.org/10.25919/5bd93643b1e41>. Hi-C is available in  
507 NCBI under BioProject PRJNA516922

## 508 Acknowledgements

509 We thank Xiaodi Xia for excellent technical assistance. JS is supported by an Australian Research Council  
510 Discovery Early Career Researcher Award 2019 (DE190100066). BS is supported by an ARC Future  
511 Fellowship (FT180100024). We acknowledge funding support from the 2Blades Foundation.

## 512 References

- 513 Allshire RC, Javerzat JP, Redhead NJ, Cranston G. 1994. Position Effect Variegation at Fission Yeast Centromeres. *Cell*  
514 76(1): 157-169.
- 515 Allshire RC, Nimmo ER, Ekwall K, Javerzat JP, Cranston G. 1995. Mutations derepressing silent centromeric domains  
516 in fission yeast disrupt chromosome segregation. *Genes Dev* 9(2): 218-233.
- 517 Axtell MJ. 2013. ShortStack: comprehensive annotation and quantification of small RNA genes. *RNA* 19(6): 740-751.
- 518 Axtell MJ, Westholm JO, Lai EC. 2011. Vive la difference: biogenesis and evolution of microRNAs in plants and animals.  
519 *Genome Biol* 12(4): 221.
- 520 Borges F, Martienssen RA. 2015. The expanding world of small RNAs in plants. *Nat Rev Mol Cell Biol* 16(12): 727-741.
- 521 Cai Q, Qiao L, Wang M, He B, Lin FM, Palmquist J, Huang HD, Jin H. 2018. Plants send small RNAs in extracellular  
522 vesicles to fungal pathogen to silence virulence genes. *Science*.
- 523 Chang SS, Zhang Z, Liu Y. 2012. RNA interference pathways in fungi: mechanisms and functions. *Annu Rev Microbiol*  
524 66: 305-323.
- 525 Chen HM, Chen LT, Patel K, Li YH, Baulcombe DC, Wu SH. 2010. 22-Nucleotide RNAs trigger secondary siRNA  
526 biogenesis in plants. *Proc Natl Acad Sci U S A* 107(34): 15269-15274.
- 527 Chen J, Upadhyaya NM, Ortiz D, Sperschneider J, Li F, Bouton C, Breen S, Dong C, Xu B, Zhang X, et al. 2017. Loss of  
528 AvrSr50 by somatic exchange in stem rust leads to virulence for Sr50 resistance in wheat. *Science* 358(6370):  
529 1607-1610.
- 530 Choi J, Kim KT, Jeon J, Wu J, Song H, Asiegbu FO, Lee YH. 2014. funRNA: a fungi-centered genomics platform for genes  
531 encoding key components of RNAi. *BMC Genomics* 15 Suppl 9: S14.
- 532 Consortium TR. 2016. RNAcentral: a comprehensive database of non-coding RNA sequences. *Nucleic Acids Res*.
- 533 Czech B, Hannon GJ. 2011. Small RNA sorting: matchmaking for Argonautes. *Nat Rev Genet* 12(1): 19-31.
- 534 Dai X, Zhuang Z, Zhao PX. 2018. psRNATarget: a plant small RNA target analysis server (2017 release). *Nucleic Acids*  
535 *Res*.
- 536 Derbyshire M, Mbengue M, Barascud M, Navaud O, Raffaele S. 2019. Small RNAs from the plant pathogenic fungus  
537 *Sclerotinia sclerotiorum* highlight host candidate genes associated with quantitative disease resistance. *Mol*  
538 *Plant Pathol* 20(9): 1279-1297.
- 539 Dubin HJB, J.P. 2009. Combating stem and leaf rust of wheat: Historical perspective, impacts, and lessons learned.  
540 *International Food Policy Research Institute*.
- 541 Duplessis S, Cuomo CA, Lin YC, Aerts A, Tisserant E, Veneault-Fourrey C, Joly DL, Hacquard S, Amselem J, Cantarel  
542 BL, et al. 2011. Obligate biotrophy features unraveled by the genomic analysis of rust fungi. *Proc Natl Acad Sci*  
543 *U S A* 108(22): 9166-9171.

- 544 **Figueroa M, Upadhyaya NM, Sperschneider J, Park RF, Szabo LJ, Steffenson B, Ellis JG, Dodds PN. 2016.** Changing the  
545 Game: Using Integrative Genomics to Probe Virulence Mechanisms of the Stem Rust Pathogen *Puccinia*  
546 *graminis* f. sp. *tritici*. *Front Plant Sci* **7**: 205.
- 547 **Fishel B, Amstutz H, Baum M, Carbon J, Clarke L. 1988.** Structural organization and functional analysis of centromeric  
548 DNA in the fission yeast *Schizosaccharomyces pombe*. *Mol Cell Biol* **8**(2): 754-763.
- 549 **Garnica DP, Nemri A, Upadhyaya NM, Rathjen JP, Dodds PN. 2014.** The ins and outs of rust haustoria. *PLoS Pathog*  
550 **10**(9): e1004329.
- 551 **Geng S, Kong X, Song G, Jia M, Guan J, Wang F, Qin Z, Wu L, Lan X, Li A, et al. 2019.** DNA methylation dynamics during  
552 the interaction of wheat progenitor *Aegilops tauschii* with the obligate biotrophic fungus *Blumeria graminis* f.  
553 sp. *tritici*. *New Phytol* **221**(2): 1023-1035.
- 554 **Gotz S, Garcia-Gomez JM, Terol J, Williams TD, Nagaraj SH, Nueda MJ, Robles M, Talon M, Dopazo J, Conesa A. 2008.**  
555 High-throughput functional annotation and data mining with the Blast2GO suite. *Nucleic Acids Res* **36**(10):  
556 3420-3435.
- 557 **Grosshans H, Filipowicz W. 2008.** Molecular biology: the expanding world of small RNAs. *Nature* **451**(7177): 414-416.
- 558 **Hacquard S, Petre B, Frey P, Hecker A, Rouhier N, Duplessis S. 2011.** The poplar-poplar rust interaction: insights from  
559 genomics and transcriptomics. *J Pathog* **2011**: 716041.
- 560 **Henikoff S, Ahmad K, Malik HS. 2001.** The centromere paradox: stable inheritance with rapidly evolving DNA. *Science*  
561 **293**(5532): 1098-1102.
- 562 **International Wheat Genome Sequencing C, investigators IRp, Appels R, Eversole K, Feuillet C, Keller B, Rogers J,**  
563 **Stein N, investigators Iw-gap, Pozniak CJ, et al. 2018.** Shifting the limits in wheat research and breeding using  
564 a fully annotated reference genome. *Science* **361**(6403).
- 565 **Kamthan A, Chaudhuri A, Kamthan M, Datta A. 2015.** Small RNAs in plants: recent development and application for  
566 crop improvement. *Front Plant Sci* **6**: 208.
- 567 **Krzywinski M, Schein J, Birol I, Connors J, Gascoyne R, Horsman D, Jones SJ, Marra MA. 2009.** Circos: an information  
568 aesthetic for comparative genomics. *Genome Res* **19**(9): 1639-1645.
- 569 **Langmead B, Trapnell C, Pop M, Salzberg SL. 2009.** Ultrafast and memory-efficient alignment of short DNA sequences  
570 to the human genome. *Genome Biol* **10**(3): R25.
- 571 **Leonard KJ, Szabo LJ. 2005.** Stem rust of small grains and grasses caused by *Puccinia graminis*. *Mol Plant Pathol* **6**(2):  
572 99-111.
- 573 **Li F, Upadhyaya NM, Sperschneider J, Matny O, Nguyen-Phuc H, Mago R, Raley C, Miller ME, Silverstein KAT,**  
574 **Henningsen E, et al. 2019.** Emergence of the Ug99 lineage of the wheat stem rust pathogen through somatic  
575 hybridisation. *bioRxiv*: 692640.
- 576 **Lister R, O'Malley RC, Tonti-Filippini J, Gregory BD, Berry CC, Millar AH, Ecker JR. 2008.** Highly integrated single-base  
577 resolution maps of the epigenome in *Arabidopsis*. *Cell* **133**(3): 523-536.
- 578 **Love MI, Huber W, Anders S. 2014.** Moderated estimation of fold change and dispersion for RNA-seq data with  
579 DESeq2. *Genome Biol* **15**(12): 550.
- 580 **Martin M. 2011.** Cutadapt removes adapter sequences from high-throughput sequencing reads. *2011* **17**(1).
- 581 **Matzke MA, Mosher RA. 2014.** RNA-directed DNA methylation: an epigenetic pathway of increasing complexity. *Nat*  
582 *Rev Genet* **15**(6): 394-408.
- 583 **Millar AA, Waterhouse PM. 2005.** Plant and animal microRNAs: similarities and differences. *Funct Integr Genomics*  
584 **5**(3): 129-135.
- 585 **Mueth NA, Ramachandran SR, Hulbert SH. 2015.** Small RNAs from the wheat stripe rust fungus (*Puccinia striiformis*  
586 f.sp. *tritici*). *BMC Genomics* **16**: 718.
- 587 **Nawrocki EP, Burge SW, Bateman A, Daub J, Eberhardt RY, Eddy SR, Floden EW, Gardner PP, Jones TA, Tate J, et al.**  
588 **2015.** Rfam 12.0: updates to the RNA families database. *Nucleic Acids Res* **43**(Database issue): D130-137.
- 589 **Nunes CC, Gowda M, Sailsbery J, Xue M, Chen F, Brown DE, Oh Y, Mitchell TK, Dean RA. 2011.** Diverse and tissue-  
590 enriched small RNAs in the plant pathogenic fungus, *Magnaporthe oryzae*. *BMC Genomics* **12**: 288.
- 591 **Petersen TN, Brunak S, von Heijne G, Nielsen H. 2011.** SignalP 4.0: discriminating signal peptides from transmembrane  
592 regions. *Nat Methods* **8**(10): 785-786.
- 593 **Pidoux AL, Allshire RC. 2005.** The role of heterochromatin in centromere function. *Philos Trans R Soc Lond B Biol Sci*  
594 **360**(1455): 569-579.
- 595 **Ramirez F, Bhardwaj V, Arrigoni L, Lam KC, Gruning BA, Villaveces J, Habermann B, Akhtar A, Manke T. 2018.** High-  
596 resolution TADs reveal DNA sequences underlying genome organization in flies. *Nat Commun* **9**(1): 189.
- 597 **Reinhart BJ, Bartel DP. 2002.** Small RNAs correspond to centromere heterochromatic repeats. *Science* **297**(5588):  
598 1831.

- 599 **Robinson MD, McCarthy DJ, Smyth GK. 2010.** edgeR: a Bioconductor package for differential expression analysis of  
600 digital gene expression data. *Bioinformatics* **26**(1): 139-140.
- 601 **Romano N, Macino G. 1992.** Quelling: transient inactivation of gene expression in *Neurospora crassa* by  
602 transformation with homologous sequences. *Mol Microbiol* **6**(22): 3343-3353.
- 603 **Servant N, Varoquaux N, Lajoie BR, Viara E, Chen CJ, Vert JP, Heard E, Dekker J, Barillot E. 2015.** HiC-Pro: an optimized  
604 and flexible pipeline for Hi-C data processing. *Genome Biol* **16**: 259.
- 605 **Shahid S, Kim G, Johnson NR, Wafula E, Wang F, Coruh C, Bernal-Galeano V, Phifer T, dePamphilis CW, Westwood  
606 JH, et al. 2018.** MicroRNAs from the parasitic plant *Cuscuta campestris* target host messenger RNAs. *Nature*  
607 **553**(7686): 82-85.
- 608 **Smith KM, Phatale PA, Sullivan CM, Pomraning KR, Freitag M. 2011.** Heterochromatin is required for normal  
609 distribution of *Neurospora crassa* CenH3. *Mol Cell Biol* **31**(12): 2528-2542.
- 610 **Soneson C, Love MI, Robinson MD. 2015.** Differential analyses for RNA-seq: transcript-level estimates improve gene-  
611 level inferences. *F1000Res* **4**: 1521.
- 612 **Stocks MB, Moxon S, Mapleson D, Woolfenden HC, Mohorianu I, Folkes L, Schwach F, Dalmay T, Moulton V. 2012.**  
613 The UEA sRNA workbench: a suite of tools for analysing and visualizing next generation sequencing microRNA  
614 and small RNA datasets. *Bioinformatics* **28**(15): 2059-2061.
- 615 **Upadhyaya NM, Garnica DP, Karaoglu H, Sperschneider J, Nemri A, Xu B, Mago R, Cuomo CA, Rathjen JP, Park RF, et  
616 al. 2014.** Comparative genomics of Australian isolates of the wheat stem rust pathogen *Puccinia graminis* f.  
617 sp. *tritici* reveals extensive polymorphism in candidate effector genes. *Front Plant Sci* **5**: 759.
- 618 **Upadhyaya NM, Garnica DP, Karaoglu H, Sperschneider J, Nemri A, Xu B, Mago R, Cuomo CA, Rathjen JP, Park RF, et  
619 al. 2015.** Comparative genomics of Australian isolates of the wheat stem rust pathogen *Puccinia graminis* f.  
620 sp. *tritici* reveals extensive polymorphism in candidate effector genes. *Front Plant Sci* **5**: 759.
- 621 **van Wolfswinkel JC, Ketting RF. 2010.** The role of small non-coding RNAs in genome stability and chromatin  
622 organization. *J Cell Sci* **123**(Pt 11): 1825-1839.
- 623 **Varoquaux N, Liachko I, Ay F, Burton JN, Shendure J, Dunham MJ, Vert JP, Noble WS. 2015.** Accurate identification  
624 of centromere locations in yeast genomes using Hi-C. *Nucleic Acids Res* **43**(11): 5331-5339.
- 625 **Vetukuri RR, Asman AK, Tellgren-Roth C, Jahan SN, Reimegard J, Fogelqvist J, Savenkov E, Soderbom F, Avrova AO,  
626 Whisson SC, et al. 2012.** Evidence for small RNAs homologous to effector-encoding genes and transposable  
627 elements in the oomycete *Phytophthora infestans*. *PLoS One* **7**(12): e51399.
- 628 **Volpe TA, Kidner C, Hall IM, Teng G, Grewal SI, Martienssen RA. 2002.** Regulation of heterochromatic silencing and  
629 histone H3 lysine-9 methylation by RNAi. *Science* **297**(5588): 1833-1837.
- 630 **Wang B, Sun Y, Song N, Zhao M, Liu R, Feng H, Wang X, Kang Z. 2017.** *Puccinia striiformis* f. sp. *tritici* microRNA-like  
631 RNA 1 (Pst-miR1), an important pathogenicity factor of Pst, impairs wheat resistance to Pst by suppressing  
632 the wheat pathogenesis-related 2 gene. *New Phytol* **215**(1): 338-350.
- 633 **Weiberg A, Wang M, Bellinger M, Jin H. 2014.** Small RNAs: a new paradigm in plant-microbe interactions. *Annu Rev*  
634 *Phytopathol* **52**: 495-516.
- 635 **Weiberg A, Wang M, Lin FM, Zhao H, Zhang Z, Kaloshian I, Huang HD, Jin H. 2013.** Fungal small RNAs suppress plant  
636 immunity by hijacking host RNA interference pathways. *Science* **342**(6154): 118-123.
- 637 **Yadav V, Sreekumar L, Guin K, Sanyal K. 2018a.** Five pillars of centromeric chromatin in fungal pathogens. *PLoS Pathog*  
638 **14**(8): e1007150.
- 639 **Yadav V, Sun S, Billmyre RB, Thimmappa BC, Shea T, Lintner R, Bakkeren G, Cuomo CA, Heitman J, Sanyal K. 2018b.**  
640 RNAi is a critical determinant of centromere evolution in closely related fungi. *Proc Natl Acad Sci U S A* **115**(12):  
641 3108-3113.
- 642 **Yadav V, Yang F, Reza MH, Liu S, Valent B, Sanyal K, Naqvi NI. 2019.** Cellular Dynamics and Genomic Identity of  
643 Centromeres in Cereal Blast Fungus. *MBio* **10**(4).

644  
645 Supplementary File S1: FASTA file of predicted *Pgt* siRNAs.

646 Supplementary File S2: FASTA file of predicted *Pgt* miRNAs.

647 Supplementary File S3: FASTA file of predicted wheat siRNAs.

648 Supplementary File S4: FASTA file of predicted wheat miRNAs.

649 Supplementary File S5: FASTA file of *Pgt* sRNAs predicted to be up-regulated in germinated spores.

650 Supplementary File S6: FASTA file of *Pgt* sRNAs predicted to be up-regulated in 3 dpi and/or 5 dpi.

651 Supplementary File S7: FASTA file of *Pgt* sRNAs predicted to be up-regulated in 7 dpi.

652 Supplementary File S8: FASTA file of *Pgt* sRNAs predicted to have no differential expression.

653 Supplementary File S9: Plots of *Pgt* chromosomes and their properties.

654

655
